# Supplementary material for: Landscape heterogeneity buffers biodiversity of simulated meta-food-webs under global change through rescue and drainage effects
Source: PubMed Central journal article supplement (PMC8342463; doi:10.1038/s41467-021-24877-0), 2021-08-05
Supplement: 41467_2021_24877_MOESM1_ESM.pdf [file 41467_2021_24877_MOESM1_ESM.pdf]

1 **Supplement:**

2 **Landscape heterogeneity buffers biodiversity of simulated meta-food-webs under**  
3 **global change through rescue and drainage effects**

4  
5  
6 Remo Ryser, Myriam R. Hirt, Johanna Häussler, Dominique Gravel, Ulrich Brose

7  
8  
9 **SUPPLEMENTARY METHODS**

10 **Supplementary Table 1: Parameters**

| Symbol               | Parameter                                                           | Value                                                        |
|----------------------|---------------------------------------------------------------------|--------------------------------------------------------------|
| $e_A$                | Conversion efficiency animal species                                | 0.906 <sup>1</sup>                                           |
| $e_P$                | Conversion efficiency plant species                                 | 0.545 <sup>1</sup>                                           |
| $X_A$<br>exp         | Scaling constant and exponent metabolic rate animal species         | 0.141<br>-0.305 <sup>2</sup>                                 |
| $X_P$<br>exp         | Scaling constant and exponent metabolic rate plant species          | 0.138<br>-0.25                                               |
| $c$                  | Interference competition                                            | 0                                                            |
| $a_0$                | Scaling factor capture coefficient for carnivorous links            | 15                                                           |
| $a_1$                | Scaling factor capture coefficient for herbivorous links            | 3500                                                         |
| $\beta_i; \beta_j$   | Allometric exponent for encounter rates                             | Carnivorous: 0.42; 0.42<br>Herbivorous: 0.19; 1 <sup>3</sup> |
| $R_{opt}$            | Optimal consumer-resource body mass ratio                           | 100                                                          |
| $\gamma$             | Exponent Ricker's function                                          | Foodchain: 2<br>Foodweb: 6                                   |
| $h_0$                | scaling factor handling time                                        | 0.4                                                          |
| $\eta_i$<br>$\eta_j$ | Allometric exponent handling time ( $i$ : consumer, $j$ : resource) | -0.48<br>-0.66 <sup>4</sup>                                  |
| $q$                  | Hill coefficient                                                    | Foodchain: 0<br>Foodweb: 0.1                                 |
| $K$                  | Half saturation density for nutrient uptake                         | Foodchain: 0.1<br>Foodweb: (0.1,0.2)                         |
| $D$                  | Nutrient turnover rate                                              | 0.25                                                         |
| $S$                  | Nutrient supply concentration                                       | variable                                                     |
| $d_{max}$            | Maximum dispersal distance                                          | 0.5                                                          |

|                             |                                                                     |                                             |
|-----------------------------|---------------------------------------------------------------------|---------------------------------------------|
| $\varepsilon$<br>$\delta_0$ | Scaling factor and exponent for species-specific dispersal distance | 0.05<br>0.1256                              |
| $a_s$                       | Maximal emigration rate                                             | Variable (Fig. 2b main text),<br>0.05       |
| $b$                         | Shape parameter of emigration function                              | 10 (0 for non-adaptive dispersal scenarios) |
| $f$                         | Additional scaling factor for capture rates for stability           | 0.05                                        |

11

12

13

14 **SUPPLEMENTARY NOTES**

15 **Rescue effect**

16 Increased dispersal loss (hostility) or the coupling with an oligotrophic patch  
17 (heterogeneity) essentially increases the strength of the drainage effect from the  
18 perspective of a eutrophic patch. However, while heterogeneity also increases the  
19 strength of the rescue effect from the perspective of an oligotrophic patch with a  
20 nutrient supply concentration of 1 (Supplementary Figure 1, left to right), dispersal loss  
21 decreases the strength of the rescue effect (Supplementary Figure 1, bottom to top)  
22 except at high heterogeneity where the pattern is slightly more complex. Here  
23 (Supplementary Figure 1, top-left), the weakened coupling with a eutrophic patch  
24 induces oscillations (see section on dynamical interference). Note that the sign on the  
25 heterogeneity axis is opposite compared to the main Figure Fig3b because here, it is the  
26 perspective of the oligotrophic patch that is coupled with a eutrophic patch, that then is  
27 reduced in its nutrient supply concentration (i.e. on the left side of the x-axis the  
28 nutrient supply of the oligotrophic (focal) patch is 1 and on the eutrophic patch it is 30,  
29 resulting in a heterogeneity of -29).

30

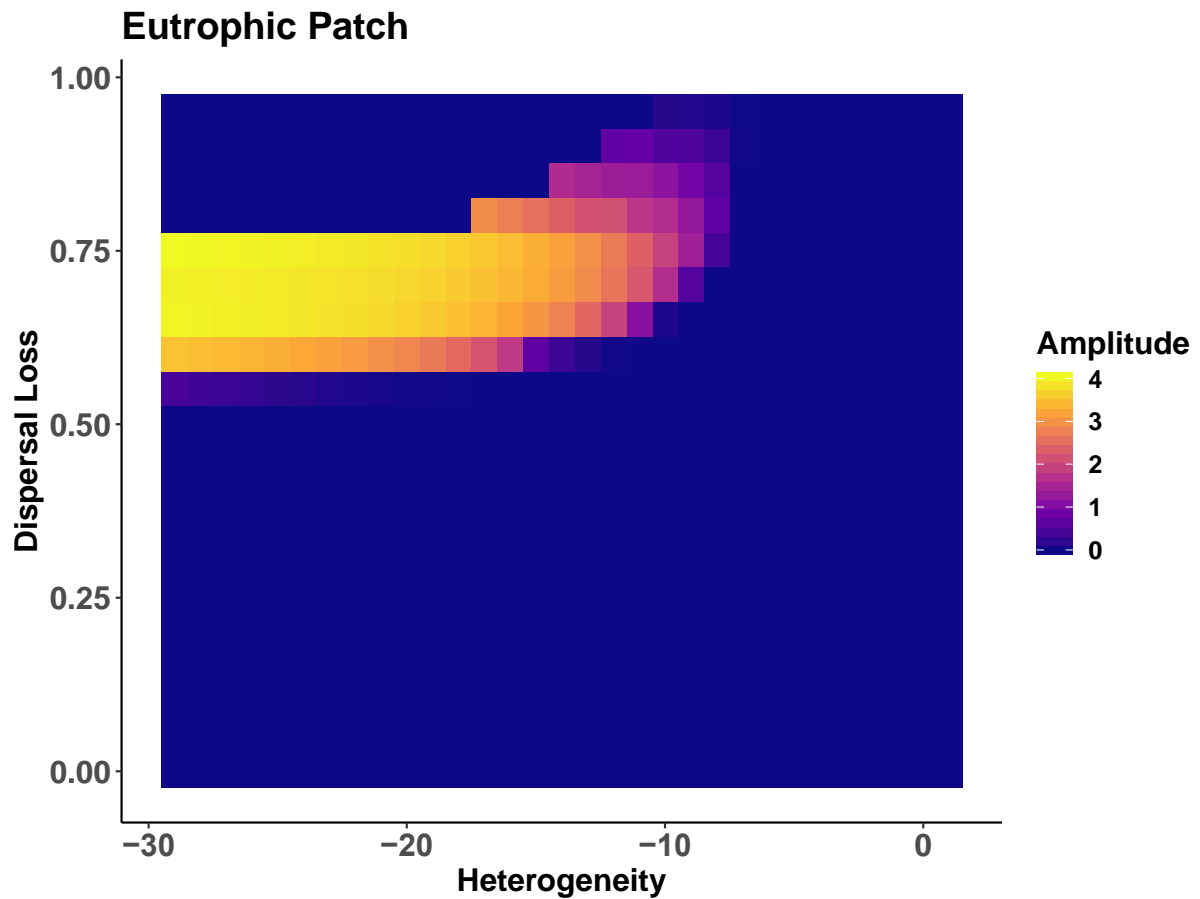

31

32 **Supplementary Figure 1:** Heat map showing the amplitude of biomass density oscillations in the predator (z-axis; colour coded) on the (always) oligotrophic patch across gradients of landscape heterogeneity (x-axis; difference in nutrient supply concentration between the two patches) and matrix hostility (y-axis) in a food chain on two patches. Amplitudes of 0 (blue) stand for an equilibrium state of the predator. Grey areas are where the predator went extinct.

36

37

### 38 **Dynamical interference**

39 When the hostility effect is very large, the coupling of the dynamics is weakened, which  
 40 results in more chaotic oscillations as the frequencies get decoupled<sup>5</sup>. This in turn can  
 41 lead to increased oscillations in the whole system that arise not from increased biomass  
 42 fluxes but from dynamical interference (top quarter in Fig.3 and top-left corner in  
 43 Supplementary Figure 1). This suggests that there is a lower threshold in strength of  
 44 spatial links where instability arises from causes beyond the drainage and rescue effect.

45 This becomes apparent in the top four rows in Supplementary Figure 2. As soon as the  
46 frequencies get decoupled, the reduction of amplitudes due do the drainage effect is  
47 overwritten and amplitudes increase again on the eutrophic patch (red).

48

49

50

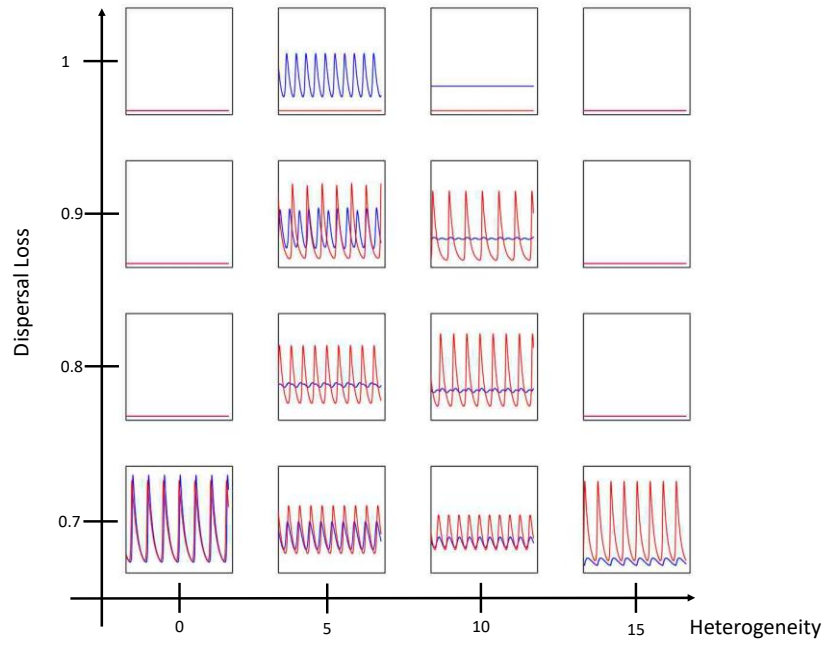

51

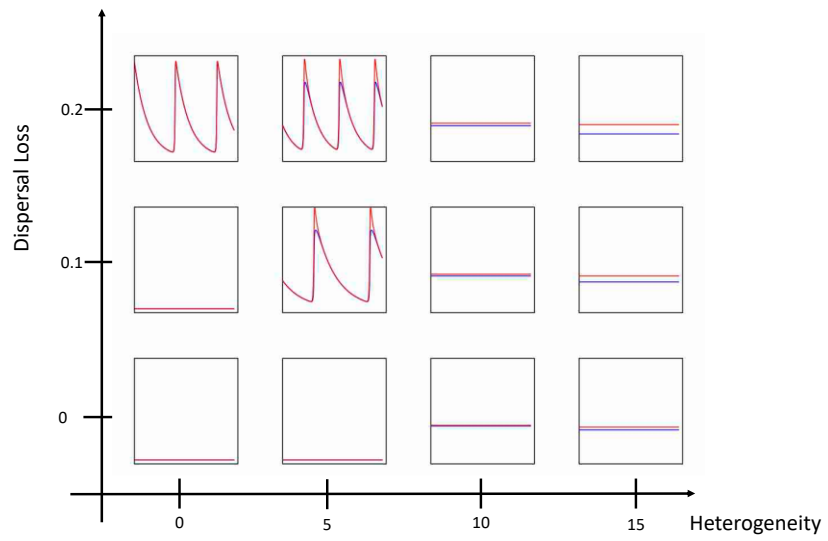

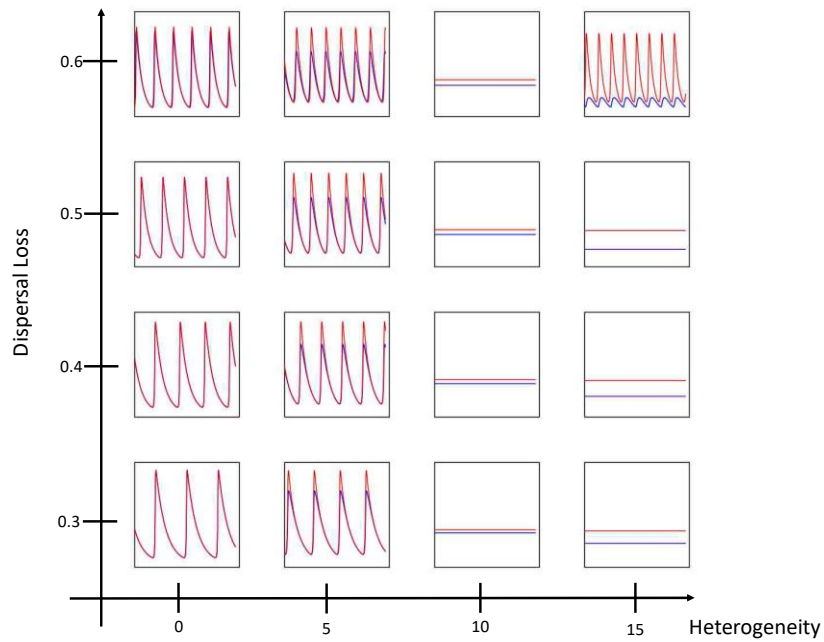

52

53 **Supplementary Figure 2:** Each plot represents biomass densities of the predator (y-axis) over time (x-  
 54 axis) on the eutrophic patch (red) and on the variable patch (blue). Plots are arranged in a grid with the x-  
 55 axis representing the landscape heterogeneity (delta nutrient supply of the eutrophic and the variable  
 56 patch) and the y-axis representing the dispersal loss corresponding to Fig. 3 in the main manuscript.

57

58

## 59 **Sensitivity**

60 To test how strongly the drainage effect depends on the underlying dispersal model, we  
 61 performed simulations in which the emigration rate is constant, i.e., is independent of  
 62 local growth rates (referred to as non-adaptive dispersal – results presented in  
 63 Supplementary Figure 3 and Supplementary Figure 4). In addition, we performed  
 64 simulations with the adaptive dispersal model but with body mass independent dispersal  
 65 ranges of organisms, i.e. organisms have the same dispersal range and therefore also the  
 66 same dispersal success for a given interpatch distance. This means that all dispersing  
 67 organisms experience the same dispersal loss rate and thus, the same matrix hostility  
 68 (results presented in Supplementary Figure 5).

69

## 70 **Non-adaptive dispersal**

71 Increasing emigration rates ( $d_{i,z}$  in equation 9; x-axis in Supplementary Figure 3), similar  
72 to an increasing maximum emigration rate ( $a$  in equation 10; x-axis in Fig. 2b in the main  
73 text), leads to a decrease in oscillation amplitudes of the carnivore population in a tri-  
74 trophic food chain on a single habitat patch.

75

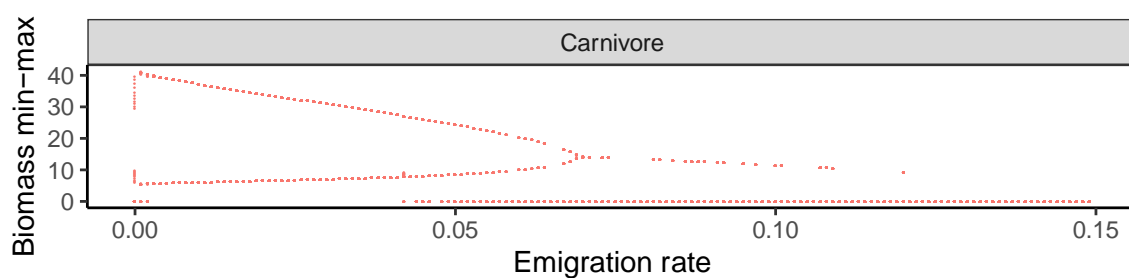

76

77 **Supplementary Figure 3: Top-predator dynamics in a food chain on a single patch with increasing**  
78 **emigration rates and non-adaptive dispersal.** The bifurcation diagram showing maximum and minimum  
79 biomass density (y-axis) when enabling emigration across a gradient of emigration rates (x-axis;  $d_{i,z}$  in  
80 Equation 9) with a nutrient supply concentration of 10.

81

82 We repeated the simulations that produced the results presented in Fig. 3b in the main  
83 text with the non-adaptive dispersal model (results presented in Supplementary Figure  
84 4). These simulations yielded almost identical results. This is also the case for the  
85 simulations in complex landscapes (compare Fig. 4 – adaptive dispersal with  
86 Supplementary Figure 5 – non-adaptive dispersal).



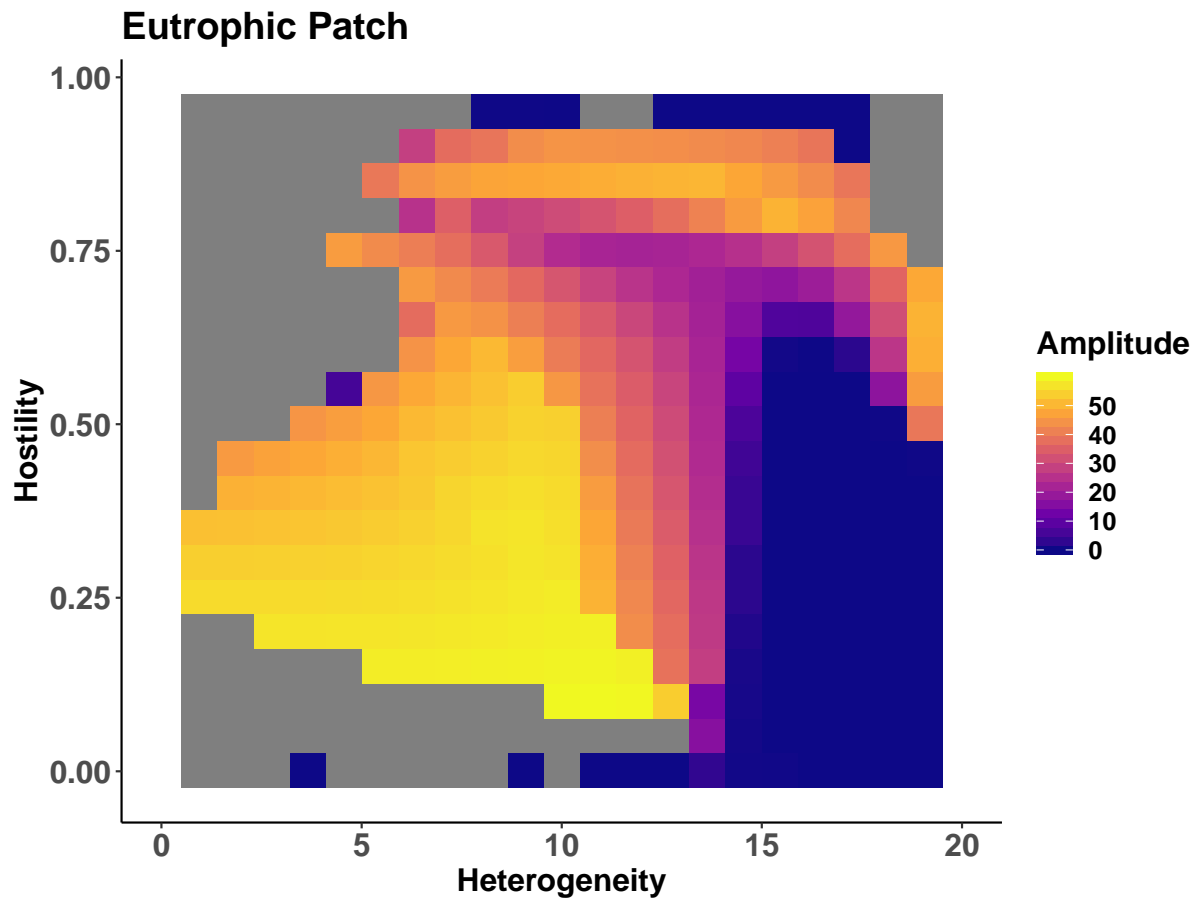

87

88 **Supplementary Figure 4: Top predator dynamics of a tri-trophic food chain on two coupled patches**  
 89 **with non-adaptive dispersal.** Heat map showing the amplitude of biomass density oscillations of the  
 90 predator (z-axis; colour coded) in the (always) eutrophic patch across gradients of landscape heterogeneity  
 91 (x-axis; difference in nutrient supply concentration between the two patches) and dispersal loss (y-axis).  
 92 Amplitudes of 0 (blue) stand for an equilibrium state of the predator. Grey areas are where the predator  
 93 went extinct.

94

95

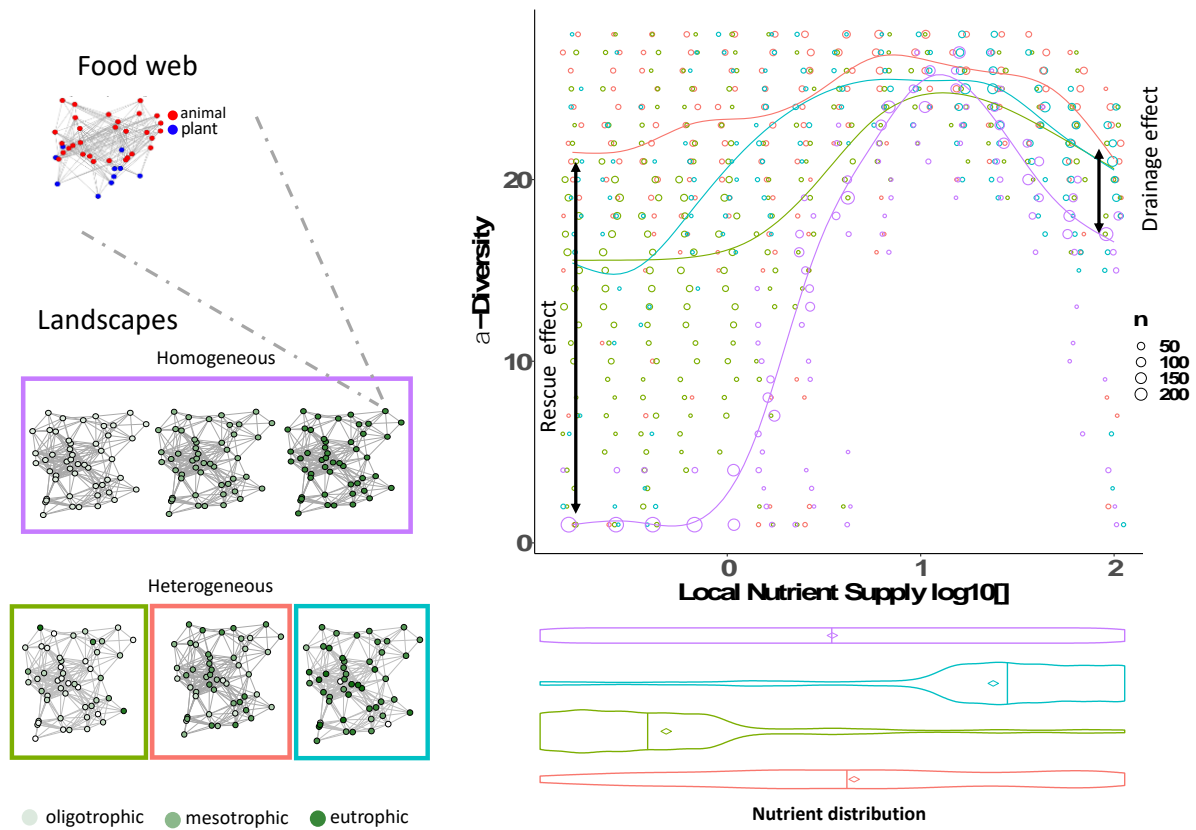

96  
 97 **Supplementary Figure 5: Landscape heterogeneity drives biodiversity in complex meta-food-webs**  
 98 **– non-adaptive dispersal.** Local diversity on a patch (y-axis) across a gradient of local patch nutrient  
 99 supply concentration in homogeneous (purple) and heterogeneous (green, orange, blue) landscapes. Violin  
 100 plots below the x-axis show nutrient distributions within the landscape for each scenario, bars represent  
 101 medians and diamonds represent means. The meta-food-web consists of a complex food web of 10 plants  
 102 and 30 animals and large homogeneous and heterogeneous landscapes with 50 habitat patches with  
 103 different patch nutrient supply concentrations (nutrient supply concentrations on habitat patches are  
 104 colour coded). Edges indicate dispersal links for an exemplary species with a dispersal range of 0.3. Lines  
 105 are a smooth fit from a GAM model with 95% confidence intervals in ggplot2, circles represent the data and  
 106 the circle size the number of data points.

107  
 108

109 **Non-body mass scaled dispersal range**

110 To test the effect of species' body mass scaled dispersal range and resulting dispersal loss  
111 we repeated the simulations used for Fig. 3b in the main text and set the herbivore's  
112 dispersal range to be equal the carnivore's dispersal range. In the model used for the main  
113 results, the herbivore had a lower dispersal range compared to the carnivore due its  
114 smaller body mass. Thus, compared to the main results, the overall dispersal losses  
115 experienced by the herbivore and the carnivore is slightly lower here. Non the less, the  
116 results obtained from these simulations (presented in Supplementary Figure 5) remained  
117 very similar.

118

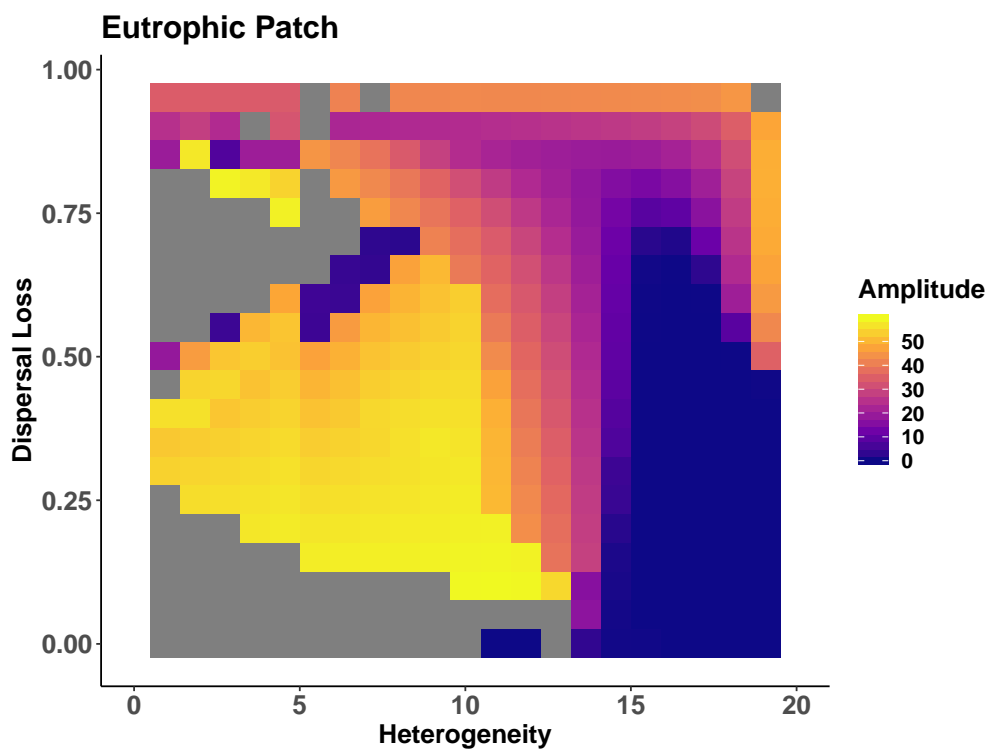

119

120 **Supplementary Figure 6: Top predator dynamics of a tri-trophic food chain on two coupled patches**  
121 **with adaptive dispersal and non-body mass scaled dispersal range.** Heat map showing the amplitude  
122 of biomass density oscillations of the predator (z-axis; colour coded) in the (always) eutrophic patch across  
123 gradients of landscape heterogeneity (x-axis; difference in nutrient supply concentration between the two  
124 patches) and dispersal loss (y-axis). Amplitudes of 0 (blue) stand for an equilibrium state of the predator.  
125 Grey areas are where the predator went extinct.

126 **Keeping landscape-average of the nutrient supply constant**

127 To address the effect of the landscape-average nutrient supply on top predator dynamics  
128 in a food chain on two dispersal-connected patches, we repeated the simulations that  
129 produced the results for Fig.3b in the main text but kept the average nutrient supply of  
130 both patches constant. This reduced the effect of heterogeneity and hostility from the  
131 perspective of a focal patch as the increase in drainage due to heterogeneity and hostility  
132 is counteracted by an increased local eutrophication.

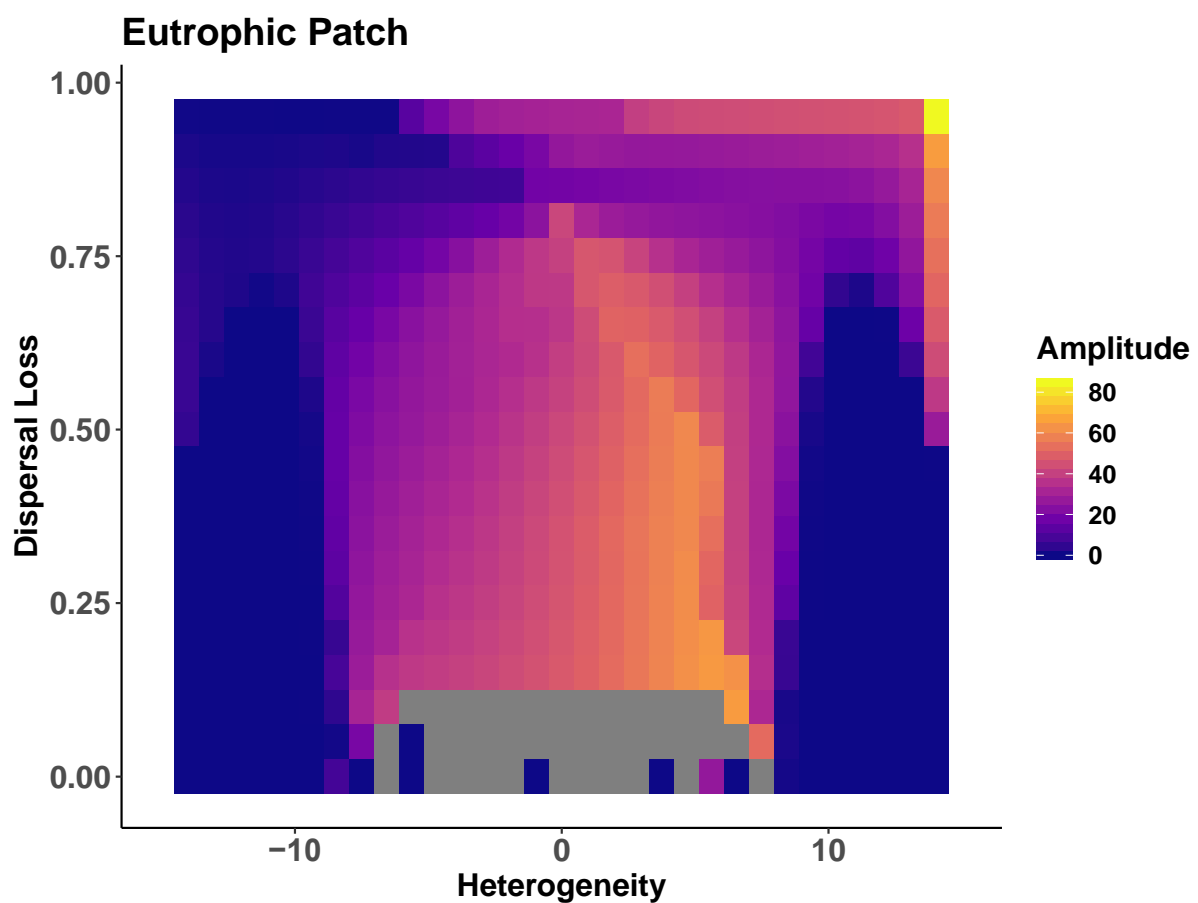

133  
134 **Supplementary Figure 7: Top predator dynamics of a tri-trophic food chain on two coupled with a**  
135 **constant landscape-average nutrient supply.** Heat map showing the amplitude of biomass density  
136 oscillations of the predator (z-axis; colour coded) in the focal patch across gradients of landscape  
137 heterogeneity (x-axis; difference in nutrient supply concentration between the two patches) and dispersal  
138 loss (y-axis). Here, a heterogeneity of 10 corresponds to the focal patch having a nutrient supply that is 10  
139 higher than on its neighbouring patch. Amplitudes of 0 (blue) stand for an equilibrium state of the predator.  
140 Grey areas are where the predator went extinct.

141 **Plants and Animals separate**

142 Splitting the results from Fig. 4 in the main text into plants and animals separately shows  
143 that it is mainly the animals profiting from rescue and drainage effects (Supplementary  
144 Figure 7) while plants only profit from the rescue effect (Supplementary Figure 8).  
145 Reasons for this may be, that increased animal diversity on oligotrophic patches in  
146 heterogeneous landscapes prevent competitive exclusion of plants, thus resulting in a  
147 cascading rescue effect. On eutrophic patches, however, the increasing drainage effect  
148 results in more animal species but may also decreases the biomass densities of animals,  
149 reducing their top-down effect on plants that eventually results in competitive exclusion  
150 of plants. Note that plants do not experience direct drainage and rescue effects as we do  
151 not let them disperse.

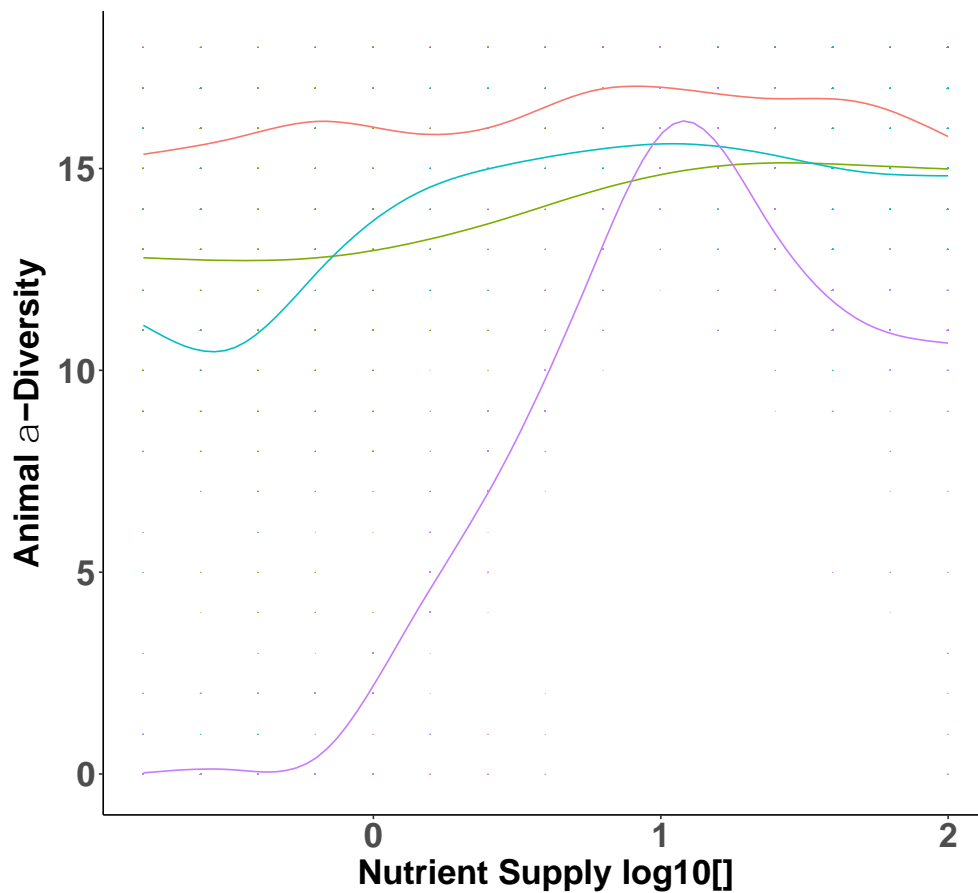

152

153 **Supplementary Figure 8:** Local animal diversity (y-axis) across a gradient of patch nutrient supply  
154 concentration in homogeneous (purple) and heterogeneous (green, orange, blue) landscapes.

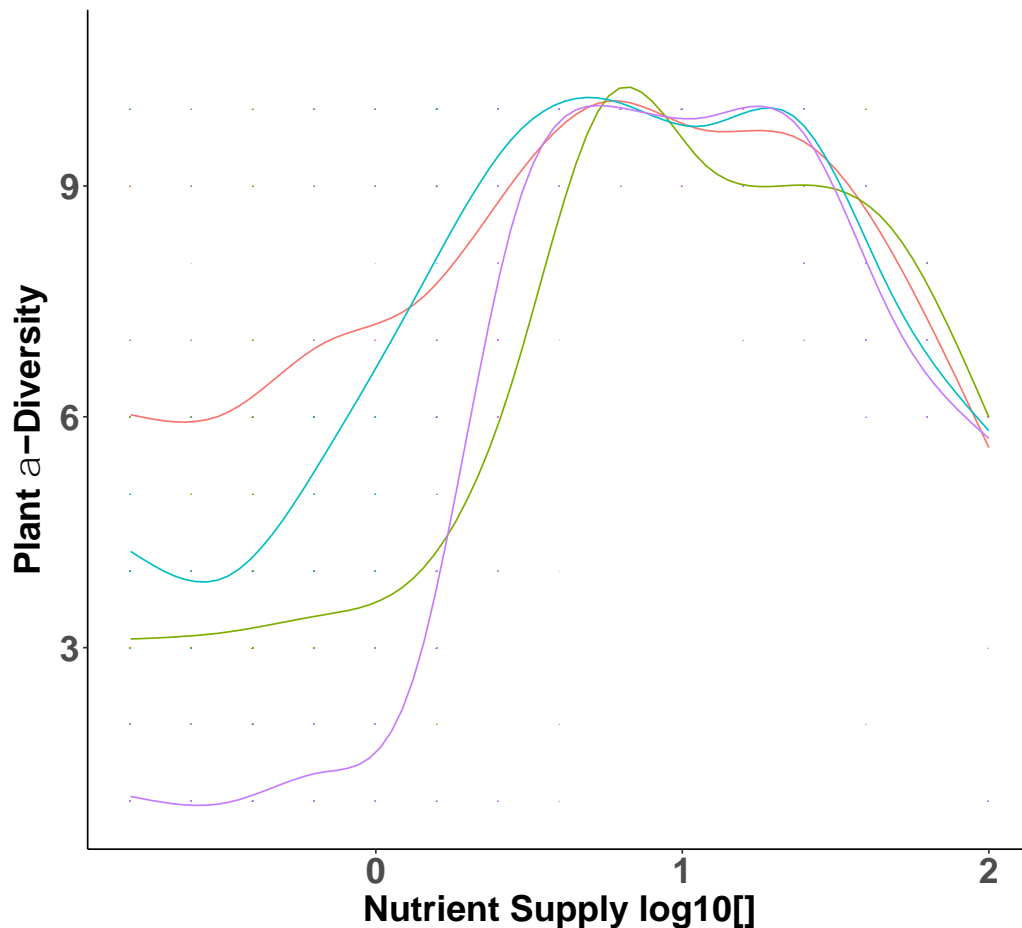

155

156 **Supplementary Figure 9:** Local plant diversity (y-axis) across a gradient of patch nutrient supply  
 157 concentration in homogeneous (purple) and heterogeneous (green, orange, blue) landscapes.

158

159 **SUPPLEMENTARY REFERENCES**

- 160 1. Lang, B., Ehnes, R. B., Brose, U. & Rall, B. C. Temperature and consumer type  
 161 dependencies of energy flows in natural communities. *Oikos* **126**, 1717–1725 (2017).  
 162 2. Ehnes, R. B., Rall, B. C. & Brose, U. Phylogenetic grouping, curvature and metabolic  
 163 scaling in terrestrial invertebrates. *Ecol. Lett.* **14**, 993–1000 (2011).  
 164 3. Hirt, M. R., Jetz, W., Rall, B. C. & Brose, U. A general scaling law reveals why the  
 165 largest animals are not the fastest. *Nat. Ecol. Evol.* **1**, 1116–1122 (2017).  
 166 4. Rall, B. C. *et al.* Universal temperature and body-mass scaling of feeding rates.  
 167 *Philos. Trans. R. Soc. B Biol. Sci.* **367**, 2923–2934 (2012).  
 168 5. Blasius, B., Montbrió, E. & Kurths, J. Anomalous phase synchronization in  
 169 populations of nonidentical oscillators. *Phys. Rev. E* **67**, 035204 (2003).

170

171
